# Supplementary material
Source: Springer Nature journal article supplement (https://www.springermedizin.de/resource/supplementary/40248_2012_41_MOESM1_ESM.pdf/9686000)

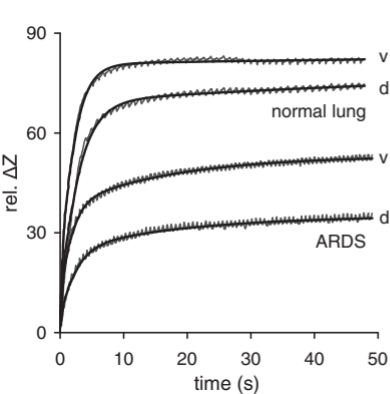

| $\tau_1$ (s) | $\tau_2$ (s) | $A_1$ (%) |
|--------------|--------------|-----------|
| 2.0          | 105.3        | 95.6      |
| 2.7          | 87.4         | 85.9      |
| 1.5          | 17.1         | 70.2      |
| 2.2          | 19.1         | 69.4      |

Supplement: MOESM1 [file 9686000]
